# Supplementary material
Source: publisher figshare collection journal article supplement (https://karger.figshare.com/ndownloader/files/30468915)
Supplement: Supplementary file 1 [file 30468915]

**Supplementary table 2:** Comparison of LDH between diagnosis, sex, age, smoking status and disease duration within a medication group

| **Parameter** | **Lab marker** | **Medication** | **GMR (95% CI)** | **p-value** |
| --- | --- | --- | --- | --- |
| Diagnosis (CD vs. UC) | LDH | Infliximab  Vedolizumab | 1.04 (0.97; 1.13)  1.06 (0.91; 1.23) | 0.28  0.48 |
| Sex (male vs. female) | LDH | Infliximab  Vedolizumab | 1.00 (0.93; 1.08)  1.05 (0.90; 1.22) | 0.94  0.57 |
| Age | LDH | Infliximab  Vedolizumab | 1.01 (1.00; 1.01)  1.00 (1.00; 1.01) | <0.001*  0.44 |
| Smoker (yes vs. no) | LDH | Infliximab  Vedolizumab | 0.99 (0.92; 1.07)  1.01 (0.87; 1.19) | 0.84  0.86 |
| Smoker (ex vs. no) | LDH | Infliximab  Vedolizumab | 0.96 (0.87; 1.05)  1.03 (0.82; 1.30) | 0.37  0.79 |
| Disease duration | LDH | Infliximab  Vedolizumab | 0.99 (0.99; 1.00)  1.00 (1.00; 1.01) | 0.005*  0.31 |
